1 **Classification of the plant-associated phenotype of *Pseudomonas***  
2 **strains using genome properties and machine learning**

3

4 Wasin Poncheewin<sup>1</sup>, Anne D. van Diepeningen<sup>2</sup>, Theo AJ van der Lee<sup>2</sup>, Maria Suarez-Diez<sup>1</sup>,  
5 Peter J. Schaap<sup>1,3\*</sup>

6

7 <sup>1</sup>Laboratory of Systems and Synthetic Biology, Wageningen University & Research, The  
8 Netherlands

9 <sup>2</sup>BU Biointeractions and Plant Health, Wageningen Plant Research, Wageningen University &  
10 Research, The Netherlands

11 <sup>3</sup>UNLOCK Large Scale Infrastructure for Microbial Communities, Wageningen University and  
12 Research, Wageningen, The Netherlands

13

14 \* Corresponding author

15 Email: [peter.schaap@wur.nl](mailto:peter.schaap@wur.nl)

16

## 17 **Abstract**

18 The rhizosphere, the region of soil surrounding roots of plants, is colonized by a unique population of  
19 Plant Growth Promoting Rhizobacteria (PGPR). By enhancing nutrient uptake from the soil and  
20 through modulation of plant phytohormone status and metabolism, PGPR can increase the stress  
21 tolerance, growth and yield of crop plants. Many important PGPR as well as plant pathogens belong  
22 to the genus *Pseudomonas*. There is, however, uncertainty on the divide between phytobeneficial and  
23 phytopathogenic strains as previously thought to be signifying genomic features have limited power  
24 to separate these strains. Here the Genome properties (GP) common biological pathways annotation  
25 system was applied to establish the relationship between the genome wide GP composition and the  
26 plant-associated phenotype of 91 *Pseudomonas* strains representing both phenotypes. GP enrichment  
27 analysis, Random Forest model fitting and feature selection revealed 28 discriminating features. A  
28 validation dataset of 67 new strains confirmed the importance of the selected features for  
29 classification. A number of unexpected discriminating features were found, suggesting involvement  
30 of novel molecular mechanisms. The results suggest that GP annotations provide a promising  
31 computational tool to better classify the plant-associated phenotype.

32

## 33 **Author summary**

34 With a growing population the need to double the agricultural food production is specified.  
35 Simultaneously, there is an urgent need to implement sustainable and climate change resilient  
36 agricultural practices that preserve natural ecosystems. Cooperative microbiomes play important  
37 positive roles in plant growth development and fitness. Properly tuned, these microbiomes can  
38 significantly reduce the need for synthetic fertilizers and can replace chemicals in crop pest control.  
39 To select beneficial candidates, their traits need to be described and likewise, potential detrimental  
40 traits should be avoided. Here we applied GP-based comparative functional genomics, enrichment  
41 analysis and Random Forest model fitting to compare known phytobeneficial and phytopathogenic

42 *Pseudomonas* strains. A number of unexpected discriminating features were found suggesting the  
43 involvement of novel molecular mechanisms.

44

## 45 **Introduction**

46 Among the targets set by the UN to achieve the zero-hunger goal, the need to double the agricultural  
47 food production is specified [1]. Earlier attempts to improve plant performance and production  
48 focused on plant breeding, pest control by chemical means and the implementation of synthetic  
49 fertilizers tapping into finite global reserves. While these strategies were successful in enhancing  
50 production, the increasing adverse effects on the environment challenges us to find sustainable  
51 alternatives [2–4].

52 A multitude of studies has demonstrated that cooperative microbiomes can play important  
53 positive roles in plant growth, development and fitness. One particular hotspot is the rhizosphere, the  
54 region of soil surrounding plant roots, colonized by Plant Growth Promoting Rhizobacteria (PGPR)[5].  
55 A stable PGPR population can increase the stress tolerance, growth and yield of crop plants by  
56 enhancing nutrient uptake from the soil and through modulation of plant phytohormone status and  
57 metabolism [6–13]. As a result, a large catalogue of plant beneficial bacterial strains has been  
58 identified. The most studied are *Pseudomonas* spp., a functionally diverse group representing both  
59 plant beneficial and pathogenic strains [14–16].

60 A diverse spectrum of plant-host interaction pathways determines the plant-associated  
61 phenotype of a *Pseudomonas* strain. Correlational approaches have identified a number of marker  
62 genes contributing to the phenotype [17–19]. These genes are however, to a certain degree, shared  
63 between beneficial and pathogenic strains [20] and consequently, with each new genome addition  
64 the uncertainty on the divide between beneficial and the pathogenic strains increases. Until now, a  
65 generic description of presence and completeness of biological pathways contributing to the plant-  
66 associated phenotype of a *Pseudomonas* strain is lacking. Such knowledge would bring fundamental

67 insights into their potential to enhance plant performance and resilience. When genes are placed in  
68 context of biological pathways comparative functional genomics is possible. Genome Properties (GP)  
69 is an annotation system whereby functional attributes can be assigned to a genome [21]. The resource  
70 represents a collection of 1286 common biological pathways, and each GP is evidenced by a distinct  
71 set of protein domains.

72 Here we applied GP-based comparative functional genomics to compare known  
73 phytobeneficial and phytopathogenic *Pseudomonas* strains using both traditional statistical analysis  
74 and machine learning methods. This allowed us to accurately classify *Pseudomonas* strains, and to  
75 identify discriminating features for both the phytofriendly and phytopathogenic lifestyle. In the  
76 discussion section these discriminating features are placed into biological context.

77

## 78 **Results**

79 Based on literature review, the complete genomes of 84 *Pseudomonas* strains were retrieved from  
80 the *Pseudomonas* Genome DB (version 17.2) [22] and categorized as encoding either a  
81 'phytofriendly' strain (51 strains) or a 'phytopathogenic' strain (33 strains). This selection was  
82 supplemented with the complete genomes of seven new or re-sequenced phytofriendly strains; *P.*  
83 *putida* P9, *P. corrugata* IDV1, *P. fluorescens* R1 and WCS374, *P. protegens* Pf-5, *P. chlororaphis* Phz24  
84 and *P. jessenii* RU47. To avoid gene and protein domain annotation inequality, the genome sequences  
85 of all 91 strains were *de novo* annotated. Subsequently, the two groups were compared using  
86 nucleotide sequence similarity, by protein domain presence and by presence and completeness of  
87 domain-based GPs (**Fig 1**). Domain content was subjected to enrichment analysis and the GP content  
88 of both groups was used to train a Random Forest (RF) model for classification and feature selection  
89 [23]. The performance of the classification methods was further validated using a set of 67 newly  
90 sequenced soil derived *Pseudomonas* genomes obtained from a newer version (V20.2) of the  
91 *Pseudomonas* Genome DB. Based on literature data. Using literature data, 17 strains of this validation  
92 set could be classified as phytofriendly strains while 34 strains were involved in bioremediation. For

93 16 strains the classification was unclear however, a number of these strains were *P. chlororaphis*  
94 strains known to be phytobeneficial.

95

## 96 **Sequence similarity**

97 We first examined the genomic relatedness between the phytobeneficial and phytopathogenic group,  
98 by calculating the Average Nucleotide Identity (ANI) scores between all possible pairs (**Fig 2**). The ANI  
99 scores showed that corresponding with their phenotypic classification the genome sequences could  
100 be divided into two groups with *Pseudomonas sp.* M30-35 being less similar to the rest of the  
101 phytobeneficial group. The average sequence similarity within the phytopathogen and the  
102 phytobeneficial group was  $90.01 \pm 5.53$  and  $79.57 \pm 4.27$  respectively. The ANI-score measures  
103 genomic similarity between the coding regions of two genomes at nucleotide-level taking into account  
104 hits that have 70% or more identity and at least 70% coverage of the shorter gene. The ANI score does  
105 not take into account the fraction of coding sequences that actually contribute to this score and thus  
106 provides no insight in the degree of strain-specific functional adaptations. To study which strain-  
107 specific functional adaptations impact the phenotype, the protein domain content of each strain was  
108 considered.

109

## 110 **Protein domain content**

111 The 91 complete *Pseudomonas* genomes contained, on average,  $5640 \pm 643$  protein encoding genes.  
112 For each genome,  $9342 \pm 709$  domains were identified with an average domain copy number of  $2.35$   
113  $\pm 0.12$  (**S1 Table**). Using domain presence as input, a group-wise enrichment analysis was done and a  
114 total of 410 and 329 protein domains were found to be significantly enriched in respectively  
115 phytobeneficial and phytopathogenic strains (**S2 Table**).  
116 Phytobeneficial strains were enriched with five domains linked to Type II secretion systems (T2SS), ten  
117 domains linked to the term “cytochrome”, eight domains linked to, “quinoxin” and six  
118 domains linked to “biofilm” (Poly-beta-1,6-N-acetyl-D-glucosamine type) biosynthesis. Interestingly,

119 domains related to “quinohemoprotein” and “biofilm” were not only enriched but also exclusively  
120 found in phytobeneficial strains.

121           Phytopathogenic strains were enriched with domains involved in various types of secretion  
122 systems. Moreover, some of these domains were not present in any of the phytobeneficial strains.  
123 Eighteen of those pathogen enriched domains are reported to be involved in the Type III secretion  
124 system and five in the Type IV secretion system. In addition, the phytopathogen list showed  
125 enrichment of nine different domain involved in phosphonate metabolism. Functional clustering of  
126 enriched domains was further explored using genome properties.

127

### 128 **Genome properties**

129 Genome properties (GP) represent a collection of currently 1286 common biological pathways. Each  
130 GP is constructed from a precomputed cluster of core protein domains which are used as essential  
131 evidence for the presence of the biological pathway [21]. Genome derived protein domains were  
132 used to construct for each strain a list of GPs with two possible evidence values: ‘YES’ indicating that  
133 the complete set of precomputed evidences had been detected and ‘PARTIAL’, indicating that the GP  
134 is likely present due to the presence of an incomplete set of evidences above a per GP specified  
135 minimal threshold. In addition, we took into account that the bacterial genes encoding domains that  
136 function in the same biological pathway are often arranged in operonic structures corresponding to  
137 syntenic blocks. For each strain therefore GPs were reconstructed not only based on protein domain  
138 presence/absence (GP-PA) but also on protein domain colocalization (GP-SND; synteny-non-  
139 directional) and on domain colocalization and being encoded on the same strand (GP-SD; synteny-  
140 directional). For domain colocalization a nearest neighbor approach was applied using a sliding  
141 window of 20 protein domains.

142

143 **Table 1** summarizes the results obtained for the three approaches.

144

145 **Table 1: Number of strain specific GP classes per approach**

| Approach | Complete | Partial  | Not detected |
|----------|----------|----------|--------------|
| GP-PA    | 440 ± 22 | 256 ± 14 | 590 ± 14     |
| GP-SND   | 161 ± 11 | 362 ± 6  | 763 ± 12     |
| GP-SD    | 158 ± 10 | 365 ± 7  | 763 ± 13     |

146

147 A total of 438 GPs were not present in any the investigated *Pseudomonas* strains. The majority of  
148 these GPs represented functions and processes typically found in eukaryotic species (**S3 Table**).  
149 Conversely, using the GP-PA method, a functional GP core of 154 complete GPs present in all strains  
150 could be obtained. When domain colocalization was used as an additional constraint a functional core  
151 of 37 complete, likely operonic, GPs was found with both domain colocalization methods. Note that  
152 overall, the GP-SND and GP-SD generated very similar output underpinning a strong linkage between  
153 operonic structures and functional genome properties in bacterial species (

154

155 **Table 1**).

156 Next, a principal component analysis (PCA) was applied to the GP data. With all three methods  
157 a clear separation between the pathogen and the biocontrol group were obtained (**S4 Fig**). **Fig 3** shows  
158 the results obtained with the GP-SND approach.

159 To further understand the contribution of each GP to the separation, we performed an  
160 enrichment analysis on the results obtained with the GP-PA, GP-SD and GP-SND approach (**S3 Table**).  
161 The enrichment analysis was performed on the binary data of presence and absence of the properties  
162 by considering “PARTIAL” as presence or absence separately, creating two enriched sets per approach.  
163 Subsequently, the two enriched sets were intersected to create the enriched set for that particular  
164 approach. Lastly, an overall enriched set was constructed by considering only the GPs that were  
165 enriched in the GP-SD and GP-SND approaches (

166 **Table 2**).

167 To extend our analysis utilizing the full information of the classes and to capture feature  
168 importance, a Random Forest (RF) classifier was built. For 99% of the strains, the RF classifier correctly

169 predicted the phenotype. The only exception was *Pseudomonas cichorii* JBC1, which had been  
 170 reported to be pathogenic but was classified by RF-classifier as phytobeneficial. To study the  
 171 discriminating variables further, variable selection from RF was implemented (

172  
 173 **Table 3** and **S3 Table**). These variables were integrated with the list of enriched GPs to  
 174 generate a comprehensive list of key genomic features contributing to the plant-associated phenotype  
 175 (**Fig 4**).

176  
 177 **Table 2: Genome Properties related to the plant-associated phenotype: enrichment analysis**

| Genome Property                                | Description                                               | Adjusted P-value      |
|------------------------------------------------|-----------------------------------------------------------|-----------------------|
| <i>GPs enriched in phytobeneficial strains</i> |                                                           |                       |
| GenProp0238*                                   | 2-aminoethylphosphonate catabolism to acetaldehyde        | $< 10^{-6}$           |
| GenProp0721*                                   | 2-aminoethylphosphonate (AEP) ABC transporter, type II    | $< 10^{-6}$           |
| GenProp0613*                                   | Cytochrome c reductase                                    | $< 10^{-6}$           |
| GenProp0907                                    | Poly-beta-1,6 N-acetyl-D-glucosamine system, PgaABCD type | $< 10^{-6}$           |
| GenProp0271                                    | Trehalose utilization                                     | $< 10^{-6}$           |
| GenProp1745                                    | GA12 biosynthesis                                         | $< 10^{-6}$           |
| GenProp1189                                    | MqsRA toxin-antitoxin complex                             | $< 10^{-6}$           |
| GenProp1645                                    | Zeaxanthin biosynthesis                                   | $< 10^{-6}$           |
| GenProp0659                                    | Tryptophan degradation to anthranilate                    | $7.96 \times 10^{-5}$ |
| GenProp0895                                    | Alcohol ABC transporter, PedABC-type                      | $7.01 \times 10^{-4}$ |
| GenProp0902                                    | Quinohemoprotein amine dehydrogenase                      | $1.40 \times 10^{-3}$ |
| GenProp1516                                    | Phosphatidylcholine biosynthesis V                        | $5.37 \times 10^{-3}$ |
| <i>GPs enriched in phytopathogenic strains</i> |                                                           |                       |
| GenProp0908*                                   | 2,3-diaminopropionic acid biosynthesis                    | $< 10^{-6}$           |
| GenProp0813*                                   | Pyrimidine utilization                                    | $< 10^{-6}$           |
| GenProp1165*                                   | PhnGHIJKL complex                                         | $< 10^{-6}$           |
| GenProp1381                                    | Methylphosphonate degradation I                           | $< 10^{-6}$           |
| GenProp0236                                    | Phosphonates ABC transport                                | $2.62 \times 10^{-3}$ |
| GenProp0710                                    | Generic phosphonates utilization                          | $2.62 \times 10^{-3}$ |
| GenProp1193                                    | RelBE toxin-antitoxin complex                             | $3.19 \times 10^{-2}$ |
| GenProp1566                                    | D-galactonate degradation                                 | $3.64 \times 10^{-2}$ |

178 \*These Genome Properties are also important random forest features (Table 3).

179



180 **Table 3: Genome Properties related to the plant-associated phenotype: Random Forest features**  
 181 **importance**

| Genome Property | Description                                                               | Predictive power** |
|-----------------|---------------------------------------------------------------------------|--------------------|
| GenProp0813*    | Pyrimidine utilization                                                    | 500                |
| GenProp0908*    | 2,3-diaminopropionic acid biosynthesis                                    | 500                |
| GenProp0721*    | 2-aminoethylphosphonate (AEP) ABC transporter, type II                    | 329                |
| GenProp0238*    | 2-aminoethylphosphonate catabolism to acetaldehyde                        | 328                |
| GenProp0615     | Cytochrome c based oxygen reduction and quinone re-oxidation              | 251                |
| GenProp0613*    | Cytochrome c reductase                                                    | 243                |
| GenProp1629     | Propanoyl-CoA degradation I                                               | 215                |
| GenProp1572     | L-carnitine degradation I                                                 | 145                |
| GenProp1562     | Fatty acid salvage                                                        | 53                 |
| GenProp1717     | Fatty acid beta-oxidation I<br>(GenProp1308, GenProp1510 and GenProp1544) | 53                 |
| GenProp1165*    | PhnGHIJKL complex                                                         | 2                  |
| GenProp1251     | L-tyrosine biosynthesis I                                                 | 2                  |
| GenProp1281     | Hydrogen sulfide biosynthesis I                                           | 1                  |
| GenProp1681     | L-cysteine degradation III                                                | 1                  |

182 \*GP also found in the enrichment analysis. \*\*Numbers were obtained using recursive feature

183 elimination (500 iterations)

184

### 185 Prediction validation

186 A set of 67 newly retrieved *Pseudomonas* genome sequences were analyzed for the presence of GPs  
 187 using the GP-SND approach and used in RF performance evaluation (**S1 Table**). Confirming the  
 188 capability of GP content to predict the plant-associated phenotype, a PCA of the full dataset (training  
 189 and validation) indicated that the separation between the phytobeneficial and the phytopathogenic  
 190 strains was retained. Additionally, a clustering of bioremediation strains with phytobeneficial strains  
 191 was observed (**Fig 5Error! Reference source not found.**). Unclassified strain *Pseudomonas* sp.  
 192 KBS0707 was positioned within the pathogen group. As all *P. syringae* are considered to be  
 193 phytopathogenic, the unclassified *P. syringae* isolate inb918 was of interest as it appeared to be a  
 194 phytobeneficial strain. The ANI score however suggested that strain inb918 might have been  
 195 taxonomically misclassified as among the *P. syringae* strains the pair-wise score between this strain

196 and the others remained below 79% (**Fig 5**). Lastly, the RF classifier was applied to the validation set  
197 and yielded the same predictions as the PCA.

198

## 199 **Discussion**

200 Plants live in symbiotic interactions with microbial communities, which are complex networks  
201 composed of interacting microbiotic nodes. The sum of these interactions can be beneficial for plant  
202 growth and development, detrimental or neutral. Many important PGPR as well as plant pathogens  
203 belong to the genus *Pseudomonas*. The genomic diversity observed at species [22] and strain level  
204 suggests that *Pseudomonas* spp. have a broad potential for evolutionary adaptation to different  
205 environments. Consequently, the plant-associated lifestyle of a *Pseudomonas* strain is likely to be the  
206 result of a combinatorial accumulation and emergence of a diverse set of contributing traits. A  
207 selected isolated genome encoded feature therefore will have limited power to confidently predict  
208 the plant-associated phenotype.

209 Differences between phytopathogenic and phytobeneficial strains emerge at all levels of  
210 analysis. At genome sequence similarity level, a separation between the two groups was prominent.  
211 As most of the described phytopathogenic genomes in the scientific literature are *P. syringae* strains,  
212 a higher degree of sequence similarity was observed for the phytopathogenic group. The ANI score,  
213 however, does not take into account the most variable genomic regions that are likely to harbor genes  
214 that function in the biological relevant differences and would provide further insight in the functional  
215 diversity within the two phytotypes. The Genome properties (GP) annotation system was applied in  
216 this study to specifically address functional differences encoded in the genomes.

217 GPs represent not only metabolic pathways but also various other classes of functional  
218 attributes and provide, compared to KEGG and SEED, a better functional annotation coverage [21].  
219 The GP annotation system is organized as a doubly linked rooted DAG. Leave nodes use domains as  
220 evidences, parent nodes, representing super-pathways, use leaf node GPs as evidences. For a  
221 functional genome comparisons at a larger scale, protein domains are better scalable and less

222 sensitive to sequence variation compared to techniques based on sequence similarity [24]. By focusing  
223 on the reconstruction of domain-based GPs only, feature independence is promoted, and the  
224 complexity of the RF-model is reduced. In total 848 domain-based GPs were annotated to be (likely)  
225 present in one or more of the here studied *Pseudomonas* strain. Underpinning the genomic diversity  
226 of the 91 *Pseudomonas* strains used in this study, in contrast a functional core of maximal 154  
227 complete and persistently present GPs was obtained. While for obvious reasons by far most of the  
228 typical eukaryotic GPs were not detected, a limited number of the *Pseudomonas* GPs may have some  
229 domain overlap with GPs of similar function typically found eukaryotic species. An example is the  
230 domain overlap between GenProp1717 and the “peroxisomal” GPs GenProp1308, GenProp1510 and  
231 GenProp1544 all involved in fatty acid beta-oxidation which we treated as one.

232 Three different approaches were used to determine the domain-based GP content of each  
233 strain. Implementation of the domain colocalization constraint mirrors the operonic structure  
234 common in bacterial genomes [25]. For domain colocalization a sliding window of 20 domains was  
235 chosen as it covers 1255 of the 1286 GPs (98%) with the most abundance group of GPs being GPs with  
236 two evidences (396 GPs) (**S5 Fig**). As the average domain copy number is 2.3, indicating that the same  
237 domain could be assigned to multiple functions across the genome, inclusion of protein domain  
238 colocalization in GP reconstruction also increases the prediction certainty of those GPs and further  
239 promotes the selection accessory traits, some of which may be acquired by lateral transfer, as RF-  
240 variables. Very similar results were obtained with GP-SND and the strain specific GP-SD method,  
241 suggesting that domain clustering most likely yields operonic structures.

242 The validation data was used to explore the performance of the RF classifier. For most  
243 validation data the RF firmly supports the discrimination between the beneficial and the pathogenic  
244 strains. *P. cichorii* JBC1 was classified as non-pathogenic. However, that does not directly translate  
245 into it being beneficial. **Fig 4** shows that *P. cichorii* JBC1 still contains three GPs associated with  
246 pathogenicity: ‘2,3-diaminopropionic acid biosynthesis’ (GenProp0908), ‘RelBE toxin-antitoxin  
247 complex’ (GenProp1193) and ‘D-galactonate degradation’ (GenProp1566). *P. cichorii* JBC1 has already

248 been reported to be quite different to other pathogenic *Pseudomonas* at the genome level [26] and  
249 our results confirm this finding suggesting that there may be different mechanisms for pathogenicity  
250 associated with this strain.

251 RF recursive feature elimination and GP enrichment analysis was used to select a minimal set  
252 of GP-variables needed for a good prediction of the phenotype [27]. GenProp0238 and GenProp0721  
253 are two of those important RF-variables and are shown to be enriched in phytobeneficial strains. The  
254 two GPs are related to mechanisms of phosphonate utilization, which have been shown to occur in  
255 *Pseudomonas* and also in other microorganisms [28]. Phosphonate is a form of phosphorus, which is  
256 essential for many biological processes [29]. However, both groups show differences in the usable  
257 form of phosphonate. Most phytobeneficial strains appear to be able to utilize only 2-  
258 aminoethylphosphonate (AEP) via the genome properties: '2-aminoethylphosphonate catabolism to  
259 acetaldehyde' (GenProp0238) and '2-aminoethylphosphonate (AEP) ABC transporter, type II'  
260 (GenProp0721), whereas the phytopathogens are able to access broader forms of phosphonates, as  
261 also shown by the enriched protein domain, via 'phosphonates ABC transport' (GenProp0236),  
262 'generic phosphonates utilization' (GenProp0710), 'PhnGHIJKL complex' (GenProp1165) and  
263 'methylphosphonate degradation I' (GenProp1381) [30]. AEP is the most abundant C-P compound in  
264 nature while other phosphonates and their derivatives are substances used in agriculture (herbicides,  
265 fungicides and insecticides) and pharmacy (antibiotics) [31]. It has been reported that the virulence of  
266 pathogenic species was enhanced under conditions of orthophosphate limitation [32]. Thus, we  
267 hypothesize this could be due to the presence of genome traits that enable them to access a wider  
268 set of phosphate sources.

269 GenProp0908 is another important RF-variable. This GP was found to be enriched in  
270 phytopathogenic strains and is involved in 2,3-diaminopropionic acid biosynthesis (DAP). DAP is a  
271 precursor of several secondary metabolites, such as siderophores, neurotoxins and antibiotics [33].  
272 Pyoverdins, the principal siderophores, have been reported to be produced exclusively by the  
273 pathogens, such as *P. syringae* and *P. cichorii* [34]. Siderophores are important metabolites involved

274 in iron acquisition [35]. Iron is crucial to many metabolic processes and is therefore required to  
275 maintain cells in a healthy state [36]. The stronger ability to scavenge for iron, and the phosphonate  
276 previously mentioned, will increase the fitness of the pathogens.

277 Two GPs strongly enriched among the phytobeneficial strains are GenProp0907, and  
278 GenProp0902. GenProp0907 represents a cluster of four genes involved in the synthesis, modification  
279 and export of the biofilm adhesin poly-beta-1,6-N-acetyl-D-glucosamine and the four domain  
280 evidences represent the four genes required. The GP is not present in the phytopathogen group and  
281 found to be complete as likely operonic structures in 39 phytobeneficial strains. Biofilms of the  
282 PgaABCD type have been studied in *Escherichia coli* [37] but not in *Pseudomonas* species.  
283 GenProp0902 represents quinohemoprotein amine dehydrogenase (QHNDH). QHNDH is a three-  
284 subunit enzyme located in the periplasmic space of *P. putida* and part of the amine oxidation  
285 respiratory chain. QHNDH catalyzes the oxidative deamination of primary amines when used as a sole  
286 carbon and energy source [38]. The GP consists of four evidences, three domains representing the  
287 alpha-, beta- and gamma-subunit of the enzyme and one representing the QHNDH maturation  
288 protein. This likely operonic GP was found to be complete in 24 biocontrol strains and not present in  
289 the pathogen group. As these GPs are only present in subset of the phytobeneficial strains, they did  
290 not emerge as important RF-variables in recursive feature elimination.

291 Protein domains associated with Type II secretion system (T2SS) were found to be enriched  
292 among the phytobeneficial strains while domains involved in the type III secretion system (T3SS) were  
293 found to be enriched among the phytopathogenic strains. T2SS is described by GenProp0053 and  
294 consists of 10 non-optional evidences and 3 optional domains. GP results however, indicated for both  
295 phytobeneficial and phytopathogenic strains a “PARTIAL” status for this GP. Similarly, the type III  
296 secretion system, represented by GenProp0052 is considered to be a key virulence factor and has  
297 been considered as evidence for pathogenicity in many genome studies [17,39,40]. GenProp0052 is a  
298 complex GP consisting of 14 evidences and 28 optional domains. Due to the set zero threshold for  
299 “PARTIAL” for this specific GP, a single evidence domain will already result in a “PARTIAL” status.

300 Eighteen protein domains enriched in phytopathogens are described to be involved in Type III  
301 secretion systems. Eleven of those enriched domains are used as evidences for GenProp0052. One  
302 other, TIGR02551, did also occur in the pathogen set but was considered not to be enriched after the  
303 Bonferroni adjustment. In contrast, the two missing evidences, TIGR02105 and TIGR02546 are only  
304 present in five phytobeneficial genomes. Thus, amongst the 91 *Pseudomonas* strains all 14 evidences  
305 are present, but none of the strains used in this study have the complete set of 14 evidences.

306 Due to the 'Partial' status of GenProp0052 (T2SS) and GenProp0053 (T3SS) for both  
307 phytotypes these GPs were not enriched, nor were they selected as discriminating variables in RF  
308 classification. We further examined the distribution of the GenProp0053 and of GenProp0052  
309 evidences over all strains (**S6 Fig**). The distribution showed that protein domains linked to  
310 GenProp0052 more consistently occurred in the pathogen group with more variation in the  
311 phytobeneficial group. The result suggests that the abundance of T3SS related domain content could  
312 be sufficient for an indication of the pathogenicity. However, there is no guarantee that the feature is  
313 functional due to the missing evidences.

314 Specifically, for the phytobeneficial group a number of enriched GPs suggested a role for  
315 pathways involved in the degradation and utilization of trehalose (GenProp0271), tryptophan  
316 (GenProp0659) (Table 2), tyrosine (GenProp1251) and carnitine (GenProp1572) (Table 3). On the  
317 other hand, phytopathogenic strains appears to be more specialized in the degradation of galactonate  
318 (GenProp1566) and cysteine (GenProp1681). Carbon sources that were predicted to be degradable by  
319 preferably the phytobeneficial group could contribute to the agricultural industry. These substrates  
320 could be used as fertilizers, growth promoters, or as additives to alternate the microbial composition  
321 [41]. Similar to elicitors, which directly enhance plant defense and resistance, this indirect approach  
322 could be applied to the existing microbial community to select for the beneficial strains and potentially  
323 increase the productivity of the crop. [42]. On the other hand, carbon sources that might prolong  
324 saprobic growth and survival of pathogens should be avoided.

325 Other GPs found in the phytobeneficial group are linked to four ‘human hormones’, which are  
326 ‘mineralocorticoid biosynthesis’ (GenProp1644), ‘estradiol biosynthesis II’ (GenProp1417),  
327 ‘glucocorticoid biosynthesis’ (GenProp1666) and ‘pregnenolone biosynthesis’ (GenProp1740). The  
328 evidence shared by these hormones, domain PF00067 (cytochrome P450), is the same as for ‘GA12  
329 biosynthesis’ (GenProp1745). Hence, only GA will be further discussed. Gibberellin 12 (GA<sub>12</sub>), is the  
330 common precursor of all gibberellins (GA) [43]. GA phytohormones play important roles in influencing  
331 the growth and development of the host plants [44] and GA from *Pseudomonas* could increase seed  
332 germination [45].

333 Not all known traits are represented by a GP. Many of those are found in phytopathogenic  
334 strains such as, coronatine, cytokinin and auxin [46]. We examined the presence of the protein  
335 domains associated to these traits in our dataset (**S7 Fig**). The results showed that the associated  
336 protein domains are generally present in both groups. Among these domains, only PF08659 and  
337 PF16197 were enriched in the phytopathogenic group. This suggests that the occurrence of these,  
338 known to be, phytopathogenic traits may not be sufficient as a genetic marker to identify the  
339 pathogenicity of a strain.

340 In conclusion, domain-based Genome Properties appear to be robust computational features  
341 to differentiate between phytobeneficial and phytopathogenic *Pseudomonas* strains and our analysis  
342 shows that incorporation of domain colocation further increases their relevance. By combining  
343 traditional statistical analysis (enrichment analysis) and machine learning methods (random forest)  
344 we were able to identify new discriminating genome properties that can be used to identify species  
345 that promote plant growth. These could be applied in strategies to develop synthetic PGPR  
346 communities and to formulate soil additives to improve plant health and performance.

347

## 348 **Materials and Methods**

349 **Genome retrieval and annotation:** *Pseudomonas* genomes with were downloaded from  
350 *Pseudomonas* Genome DB version 17.2. The validation set was obtained from database version 20.2  
351 (<https://www.pseudomonas.com>) [22]. Genomes were manually categorized according their  
352 phytotype using literature data. Additionally, 7 genome sequences were (re)sequenced from  
353 phytobeneficial strains *P. putida* P9 (accession ERS6670306), *P. Corrugata* IDV1 (accession  
354 ERS6652532), *P. fluorescens* R1 (accession ERS6670181), *P. protegens* Pf-5 (accession ERS6652530), *P.*  
355 *chlororaphis* Phz24 (accession ERS6670416), *P. jessenii* RU47 (accession ERS6670307) and *P.*  
356 *fluorescens* WCS374 (accession ERS6652531). DNA was extracted using the Epicenter Masterpure  
357 kit (Epicentre Technologies, USA) according to the manufacturer's protocol, quantified. For with  
358 the Infinite® 200 PRO (Tecan, Männedorf, Switzerland) using the Quant-iT™ PicoGreen™ dsDNA Assay  
359 Kit (ThermoFisher, Waltham, USA) according to the manufacturer's protocol. The strains were  
360 sequenced on the PacBio Platform (Pacific BioSciences, Menlo Park, USA). A total of 4 ug DNA was  
361 sheared to 7 Kb and two SMRT bell libraries were prepared using the kit Barcoded Adapters for  
362 Multiplex SMRT sequencing in combination with the Sequel Binding Kit V2.0 and the Sequel  
363 Polymerase 2.0 Kit. Per library, a pool with sheared DNA of all strains was used as input according to  
364 the manufacturer's protocol. Sequencing was done on a Sequel system operated at the services of  
365 Business Unit Bioscience, Wageningen Plant Research (Wageningen, The Netherlands). Subsequently,  
366 de-multiplexing was performed by aligning the barcodes to the sub-reads with pyPaSWAS version 3.0  
367 [47]. Canu version 1.6 [48] was used to assemble the PacBio reads

368 The SAPP semantic annotation framework [49] was used to systematically (re)annotated the  
369 genomes. Briefly, protein encoding genes were de novo predicted using Prodigal 2.6.3 [50] and protein  
370 domains were characterized with InterProScan 5.36-75.0 using the Pfam and TIGRFAMs databases  
371 [51–53]. Annotation data and meta-data was stored in a semantic database using the GBOL ontology  
372 [54,55]. SPARQL queries were used to extract protein domain identifiers, and the location and  
373 direction of the corresponding gene.



374 **Data processing:** OrthoANI version 1.40 was used to calculate the Average Nucleotide Identity (ANI)  
375 score for all genomes [56]. PygenProp, was used to infer from each genome domain-based GPs, [55].  
376 Three criteria were applied; “PA”, considering only domain presence as evidence, “SND”, synteny-  
377 non-directional, requiring the genome location of the corresponding domains to be in close proximity  
378 and “SD” that in addition to gene location also considers strandness. For SND and SD a nearest  
379 neighbor approach and a sliding window of 20 protein domains was applied. Each GP was classified  
380 as either ‘YES’, or ‘PARTIAL’ according to the completeness of the set of evidences.

381 **Statistical analysis:** The natural grouping of the data was visualized using principal component  
382 analysis (prcomp package). Then, with R packages; fisher.test and p.adjust, Fisher Exact Test with  
383 Bonferroni correction was applied to protein domains and the genome properties to test for  
384 enrichment. This analysis identified the over- and under-represented features. GP data was  
385 reassessed twice by considering ‘PARTIAL’ as either ‘YES’ or ‘NO’. The enriched list was created by  
386 intersecting the two cases of ‘PARTIAL’. Enrichments were considered significant if the adjusted p-  
387 value after Bonferroni correction of the GP is below 0.05.

388 The Random Forest classifier was created using R package randomForest v4.6-14 [58].  
389 Labelled data were divided into training and test sets. The unbiased training set was created with  
390 equal numbers per group determined by using 75% of the smaller group, the pathogen group,  
391 resulting in 25 strains per group. Therefore, the test set remains with 33 phytobeneficials and 8  
392 phytopathogens. The Variable Selection from Random Forests v 0.7-8 (varSelRF) package in R was used  
393 to determine variable importance. We used 5000 trees for the first forest and 2000 trees for all  
394 additional forests during the iteration. Vars.drop.frac, the portion of the variable that is excluded on  
395 each iteration, was set to 0.2.

396

397 **Acknowledgements**

398 WP is financially supported by a Royal Thai Government Scholarship, Thailand. TL acknowledges the  
399 support by the Dutch Ministry of Economic Affairs in the Topsector Program “Horticulture and Starting  
400 Materials” under the theme “Plant Health” (project number: TU 16022) and its partners (NAK,  
401 Naktuinbouw and BKD). PS and MSD acknowledge the Dutch national funding agency NWO, and  
402 Wageningen University and Research for their financial contribution to the Unlock initiative (NWO:  
403 184.035.007).

404

## 405 **References**

406

- 407 1. Nations U. United Nations | Peace, dignity and equality on a healthy planet. In: United  
408 Nations [Internet]. United Nations; [cited 10 Feb 2021]. Available:  
409 <https://www.un.org/en/>
- 410 2. Arif I, Batool M, Schenk PM. Plant Microbiome Engineering: Expected Benefits for  
411 Improved Crop Growth and Resilience. *Trends in Biotechnology*. 2020;38: 1385–1396.  
412 doi:10.1016/j.tibtech.2020.04.015
- 413 3. Timmusk S, Behers L, Muthoni J, Muraya A, Aronsson A-C. Perspectives and  
414 Challenges of Microbial Application for Crop Improvement. *Front Plant Sci*. 2017;8:  
415 49–49. doi:10.3389/fpls.2017.00049
- 416 4. Vejan P, Abdullah R, Khadiran T, Ismail S, Nasrulhaq Boyce A. Role of Plant Growth  
417 Promoting Rhizobacteria in Agricultural Sustainability-A Review. *Molecules*. 2016;21:  
418 573. doi:10.3390/molecules21050573
- 419 5. Bakker PAHM, Berendsen RL, Doornbos RF, Wintermans PCA, Pieterse CMJ. The  
420 rhizosphere revisited: root microbiomics. *Frontiers in plant science*. 2013;4: 165.  
421 doi:10.3389/fpls.2013.00165
- 422 6. Backer R, Rokem JS, Ilangumaran G, Lamont J, Praslickova D, Ricci E, et al. Plant  
423 Growth-Promoting Rhizobacteria: Context, Mechanisms of Action, and Roadmap to  
424 Commercialization of Biostimulants for Sustainable Agriculture. *Frontiers in Plant  
425 Science*. 2018;9: 1473. doi:10.3389/fpls.2018.01473
- 426 7. Finkel OM, Castrillo G, Herrera Paredes S, Salas González I, Dangl JL. Understanding  
427 and exploiting plant beneficial microbes. *Curr Opin Plant Biol*. 2017/06/13 ed. 2017;38:  
428 155–163. doi:10.1016/j.pbi.2017.04.018
- 429 8. Gupta G, Parihar SS, Ahirwar NK, Snehi SK, Singh V. Plant growth promoting  
430 rhizobacteria (PGPR): current and future prospects for development of sustainable  
431 agriculture. *J Microb Biochem Technol*. 2015;7: 096–102.

- 432 9. Ilangumaran G, Smith DL. Plant Growth Promoting Rhizobacteria in Amelioration of  
433 Salinity Stress: A Systems Biology Perspective. *Frontiers in Plant Science*. 2017;8:  
434 1768. doi:10.3389/fpls.2017.01768
- 435 10. Köhl L, Oehl F, van der Heijden MGA. Agricultural practices indirectly influence plant  
436 productivity and ecosystem services through effects on soil biota. *Ecological*  
437 *Applications*. 2014;24: 1842–1853. doi:10.1890/13-1821.1
- 438 11. Kumar A, Patel JS, Meena VS, Srivastava R. Recent advances of PGPR based  
439 approaches for stress tolerance in plants for sustainable agriculture. *Biocatalysis and*  
440 *Agricultural Biotechnology*. 2019;20: 101271. doi:10.1016/j.bcab.2019.101271
- 441 12. Lugtenberg BJJ, Malfanova N, Kamilova F, Berg G. Microbial Control of Plant Root  
442 Diseases. *Molecular Microbial Ecology of the Rhizosphere*. John Wiley & Sons, Ltd;  
443 2013. pp. 575–586. doi:10.1002/9781118297674.ch54
- 444 13. Vacheron J, Desbrosses G, Bouffaud M-L, Touraine B, Moëgne-Loccoz Y, Muller D, et  
445 al. Plant growth-promoting rhizobacteria and root system functioning. *Frontiers in Plant*  
446 *Science*. 2013;4: 356. doi:10.3389/fpls.2013.00356
- 447 14. Qessaoui R, Bouharroud R, Furze JN, El Aalaoui M, Akroud H, Amarraque A, et al.  
448 Applications of New Rhizobacteria *Pseudomonas* Isolates in Agroecology via  
449 Fundamental Processes Complementing Plant Growth. *Scientific Reports*. 2019;9:  
450 12832. doi:10.1038/s41598-019-49216-8
- 451 15. Shaikh S, Yadav N, Markande AR. Interactive potential of *Pseudomonas* species with  
452 plants. *Journal of Applied Biology & Biotechnology* Vol. 2020;8: 101–111.
- 453 16. Sitaraman R. *Pseudomonas* spp. as models for plant-microbe interactions. *Front Plant*  
454 *Sci*. 2015;6: 787–787. doi:10.3389/fpls.2015.00787
- 455 17. Baltrus DA, Nishimura MT, Romanchuk A, Chang JH, Mukhtar MS, Cherkis K, et al.  
456 Dynamic Evolution of Pathogenicity Revealed by Sequencing and Comparative  
457 Genomics of 19 *Pseudomonas syringae* Isolates. *PLOS Pathogens*. 2011;7: e1002132.  
458 doi:10.1371/journal.ppat.1002132
- 459 18. Liu B, Zheng D, Jin Q, Chen L, Yang J. VFDB 2019: a comparative pathogenomic  
460 platform with an interactive web interface. *Nucleic Acids Res*. 2019;47: D687–D692.  
461 doi:10.1093/nar/gky1080
- 462 19. Loper JE, Hassan KA, Mavrodi DV, Davis EW II, Lim CK, Shaffer BT, et al.  
463 Comparative Genomics of Plant-Associated *Pseudomonas* spp.: Insights into Diversity  
464 and Inheritance of Traits Involved in Multitrophic Interactions. *PLOS Genetics*. 2012;8:  
465 e1002784. doi:10.1371/journal.pgen.1002784
- 466 20. Passera A, Compant S, Casati P, Maturo MG, Battelli G, Quaglino F, et al. Not Just a  
467 Pathogen? Description of a Plant-Beneficial *Pseudomonas syringae* Strain. *Front*  
468 *Microbiol*. 2019;10: 1409–1409. doi:10.3389/fmicb.2019.01409
- 469 21. Richardson LJ, Rawlings ND, Salazar GA, Almeida A, Haft DR, Ducq G, et al. Genome  
470 properties in 2019: a new companion database to InterPro for the inference of complete  
471 functional attributes. *Nucleic acids research*. 2018;47: D564–D572.

- 472 22. Winsor GL, Griffiths EJ, Lo R, Dhillon BK, Shay JA, Brinkman FS. Enhanced  
473 annotations and features for comparing thousands of *Pseudomonas* genomes in the  
474 *Pseudomonas* genome database. *Nucleic acids research*. 2016;44: D646–D653.
- 475 23. Breiman L. Random Forests. *Machine Learning*. 2001;45: 5–32.  
476 doi:10.1023/A:1010933404324
- 477 24. Koehorst JJ, van Dam JCJ, van Heck RGA, Saccenti E, dos Santos VAPM, Suarez-Diez  
478 M, et al. Comparison of 432 *Pseudomonas* strains through integration of genomic,  
479 functional, metabolic and expression data. *Scientific Reports*. 2016;6: 38699.  
480 doi:10.1038/srep38699
- 481 25. Bergman NH, Passalacqua KD, Hanna PC, Qin ZS. Operon Prediction for Sequenced  
482 Bacterial Genomes without Experimental Information. *Appl Environ Microbiol*.  
483 2007;73: 846. doi:10.1128/AEM.01686-06
- 484 26. Ramkumar G, Lee SW, Weon H-Y, Kim B-Y, Lee YH. First report on the whole genome  
485 sequence of *Pseudomonas cichorii* strain JBC1 and comparison with other *Pseudomonas*  
486 species. *Plant Pathology*. 2015;64: 63–70. doi:10.1111/ppa.12259
- 487 27. Díaz-Uriarte R, Alvarez de Andrés S. Gene selection and classification of microarray  
488 data using random forest. *BMC Bioinformatics*. 2006;7: 3. doi:10.1186/1471-2105-7-3
- 489 28. Villarreal-Chiu JF, Quinn JP, McGrath JW. The genes and enzymes of phosphonate  
490 metabolism by bacteria, and their distribution in the marine environment. *Front*  
491 *Microbiol*. 2012;3: 19–19. doi:10.3389/fmicb.2012.00019
- 492 29. Yu X, Doroghazi JR, Janga SC, Zhang JK, Circello B, Griffin BM, et al. Diversity and  
493 abundance of phosphonate biosynthetic genes in nature. *Proc Natl Acad Sci U S A*.  
494 2013/12/02 ed. 2013;110: 20759–20764. doi:10.1073/pnas.1315107110
- 495 30. White AK, Metcalf WW. Microbial Metabolism of Reduced Phosphorus Compounds.  
496 *Annu Rev Microbiol*. 2007;61: 379–400. doi:10.1146/annurev.micro.61.080706.093357
- 497 31. Shiraishi T, Kuzuyama T. Biosynthetic pathways and enzymes involved in the production  
498 of phosphonic acid natural products. *Bioscience, Biotechnology, and Biochemistry*.  
499 2021;85: 42–52. doi:10.1093/bbb/zbaa052
- 500 32. Lamarche MG, Wanner BL, Crépin S, Harel J. The phosphate regulon and bacterial  
501 virulence: a regulatory network connecting phosphate homeostasis and pathogenesis.  
502 *FEMS Microbiology Reviews*. 2008;32: 461–473. doi:10.1111/j.1574-  
503 6976.2008.00101.x
- 504 33. Ernst DC, Anderson ME, Downs DM. L-2,3-diaminopropionate generates diverse  
505 metabolic stresses in *Salmonella enterica*. *Mol Microbiol*. 2016/05/06 ed. 2016;101:  
506 210–223. doi:10.1111/mmi.13384
- 507 34. Bultreys A, Gheysen I. Siderophore Uses in *Pseudomonas syringae* Identification. In:  
508 Fatmi M, Collmer A, Iacobellis NS, Mansfield JW, Murillo J, Schaad NW, et al.,  
509 editors. *Pseudomonas syringae* Pathovars and Related Pathogens – Identification,  
510 Epidemiology and Genomics. Dordrecht: Springer Netherlands; 2008. pp. 21–35.  
511 doi:10.1007/978-1-4020-6901-7\_2

- 512 35. Kobylarz MJ, Grigg JC, Shin-ichi JT, Rai DK, Heinrichs DE, Murphy ME. Synthesis of  
513 L-2, 3-diaminopropionic acid, a siderophore and antibiotic precursor. *Chemistry &*  
514 *biology*. 2014;21: 379–388.
- 515 36. Aznar A, Dellagi A. New insights into the role of siderophores as triggers of plant  
516 immunity: what can we learn from animals? *Journal of experimental botany*. 2015;66:  
517 3001–3010.
- 518 37. Wang X, Preston JF 3rd, Romeo T. The pgaABCD locus of *Escherichia coli* promotes the  
519 synthesis of a polysaccharide adhesin required for biofilm formation. *J Bacteriol*.  
520 2004;186: 2724–2734. doi:10.1128/jb.186.9.2724-2734.2004
- 521 38. ADACHI O, KUBOTA T, HACISALIHOGU A, TOYAMA H, SHINAGAWA E,  
522 DUINE JA, et al. Characterization of Quinohemoprotein Amine Dehydrogenase from  
523 *Pseudomonas putida*. *Bioscience, Biotechnology, and Biochemistry*. 1998;62: 469–478.  
524 doi:10.1271/bbb.62.469
- 525 39. Büttner D. Protein Export According to Schedule: Architecture, Assembly, and  
526 Regulation of Type III Secretion Systems from Plant- and Animal-Pathogenic Bacteria.  
527 *Microbiol Mol Biol Rev*. 2012;76: 262. doi:10.1128/MMBR.05017-11
- 528 40. Lombardi C, Tolchard J, Bouillot S, Signor L, Gebus C, Liebl D, et al. Structural and  
529 Functional Characterization of the Type Three Secretion System (T3SS) Needle of  
530 *Pseudomonas aeruginosa*. *Frontiers in Microbiology*. 2019;10: 573.  
531 doi:10.3389/fmicb.2019.00573
- 532 41. Wawrik B, Kerkhof L, Kukor J, Zylstra G. Effect of different carbon sources on  
533 community composition of bacterial enrichments from soil. *Appl Environ Microbiol*.  
534 2005;71: 6776–6783. doi:10.1128/AEM.71.11.6776-6783.2005
- 535 42. Thakur M, Sohal BS. Role of Elicitors in Inducing Resistance in Plants against Pathogen  
536 Infection: A Review. *ISRN Biochem*. 2013;2013: 762412–762412.  
537 doi:10.1155/2013/762412
- 538 43. Regnault T, Davière J-M, Wild M, Sakvarelidze-Achard L, Heintz D, Carrera Bergua E,  
539 et al. The gibberellin precursor GA12 acts as a long-distance growth signal in  
540 *Arabidopsis*. *Nature Plants*. 2015;1: 15073. doi:10.1038/nplants.2015.73
- 541 44. Morrone D, Chambers J, Lowry L, Kim G, Anterola A, Bender K, et al. Gibberellin  
542 biosynthesis in bacteria: Separate ent-copalyl diphosphate and ent-kaurene synthases in  
543 *Bradyrhizobium japonicum*. *FEBS Letters*. 2009;583: 475–480.  
544 doi:10.1016/j.febslet.2008.12.052
- 545 45. Bharathi R, Vivekananthan R, Harish S, Ramanathan A, Samiyappan R. Rhizobacteria-  
546 based bio-formulations for the management of fruit rot infection in chillies. *Crop*  
547 *Protection*. 2004;23: 835–843. doi:10.1016/j.cropro.2004.01.007
- 548 46. Ruinelli M, Blom J, Smits THM, Pothier JF. Comparative genomics and pathogenicity  
549 potential of members of the *Pseudomonas syringae* species complex on *Prunus* spp.  
550 *BMC Genomics*. 2019;20: 172. doi:10.1186/s12864-019-5555-y

- 551 47. Warris S, Timal NRN, Kempenaar M, Poortinga AM, van de Geest H, Varbanescu AL, et  
552 al. pyPaSWAS: Python-based multi-core CPU and GPU sequence alignment. PLOS  
553 ONE. 2018;13: e0190279. doi:10.1371/journal.pone.0190279
- 554 48. Koren S, Walenz BP, Berlin K, Miller JR, Bergman NH, Phillippy AM. Canu: scalable  
555 and accurate long-read assembly via adaptive k-mer weighting and repeat separation.  
556 Genome Res. 2017/03/15 ed. 2017;27: 722–736. doi:10.1101/gr.215087.116
- 557 49. Koehorst JJ, van Dam JCJ, Saccenti E, Martins dos Santos VAP, Suarez-Diez M, Schaap  
558 PJ. SAPP: functional genome annotation and analysis through a semantic framework  
559 using FAIR principles. Bioinformatics. 2017;34: 1401–1403.
- 560 50. Hyatt D, Chen G-L, LoCascio PF, Land ML, Larimer FW, Hauser LJ. Prodigal:  
561 prokaryotic gene recognition and translation initiation site identification. BMC  
562 bioinformatics. 2010;11: 119.
- 563 51. El-Gebali S, Mistry J, Bateman A, Eddy SR, Luciani A, Potter SC, et al. The Pfam  
564 protein families database in 2019. Nucleic acids research. 2019;47: D427–D432.
- 565 52. Haft DH, Loftus BJ, Richardson DL, Yang F, Eisen JA, Paulsen IT, et al. TIGRFAMs: a  
566 protein family resource for the functional identification of proteins. Nucleic Acids  
567 Research. 2001;29: 41–43. doi:10.1093/nar/29.1.41
- 568 53. Jones P, Binns D, Chang H-Y, Fraser M, Li W, McAnulla C, et al. InterProScan 5:  
569 genome-scale protein function classification. Bioinformatics. 2014;30: 1236–1240.
- 570 54. van Dam JCJ, Koehorst JJJ, Vik JO, Schaap PJ, Suarez-Diez M. Interoperable genome  
571 annotation with GBOL, an extendable infrastructure for functional data mining.  
572 bioRxiv. 2017; 184747.
- 573 55. van Dam JCJ, Koehorst JJ, Vik JO, Martins dos Santos VAP, Schaap PJ, Suarez-Diez M.  
574 The Empusa code generator and its application to GBOL, an extendable ontology for  
575 genome annotation. Scientific Data. 2019;6: 254. doi:10.1038/s41597-019-0263-7
- 576 56. Lee I, Kim YO, Park S-C, Chun J. OrthoANI: an improved algorithm and software for  
577 calculating average nucleotide identity. International journal of systematic and  
578 evolutionary microbiology. 2016;66: 1100–1103.
- 579 57. Bergstrand LH, Neufeld JD, Doxey AC. Pygenprop: a Python library for programmatic  
580 exploration and comparison of organism Genome Properties. Bioinformatics. 2019.
- 581 58. Liaw A, Wiener M. Classification and regression by randomForest. R news. 2002;2: 18–  
582 22.

583

584

585

586

## 587 **Supporting information**

### 588 **S1 Table. List of strains.**

589 List of strains used in this study. The dataset used for the initial analysis and the validation data are in  
590 different tabs. The list provides strain's name, their classification along with their corresponding  
591 annotation information.

592 (XLSX)

### 593 **S2 Table. Enriched protein domains.**

594 Enriched protein domains on phytopathogenic and phytobeneficial strains with the p-value and  
595 number of occurrences.

596 (XLSX)

### 597 **S3 Table. Genome Properties analysis.**

598 Genome Properties analysis results divided into 9 sheets. First three sheets are according to the  
599 analysis approaches: GP-PA (presence-absence), GP-SD (synteny-directional) and GP-SND (synteny-  
600 nondirectional). Sheets 4 and 5 are the enriched GP of the phytopathogen and beneficial respectively.  
601 Sheets 6 to 8 are the variable selection using the Random Forest using 3 analysis approaches. The final  
602 sheet are the GPs that are not presented according to any approaches.

603 (XLSX)

### 604 **S4 Fig. PCA using 3 approaches.**

605 (PDF)

### 606 **S5 Fig. Distribution of number of evidences of the Genome Properties.**

607 (PDF)

### 608 **S6 Fig. Distribution of non-optional evidences of GenProp0053 and GenProp0052.**

609 (PDF)

610 **S7 Fig. Presence and absence of protein domains associated to genes related to selected**  
611 **pathogenic traits found in *P. syringae*.**

612 (PDF)

613

## 614 **Figure Captions**

615 **Fig 1: Workflow for GPs based functional genomics and classification.** Genome sequences are  
616 analyzed using sequence similarity and protein domain content. (Colocalized) protein domain content  
617 is used to infer Genome Properties. Enrichment analysis and Random Forest feature selection was  
618 used obtain genomic features. Classification performance was evaluated using a validation dataset of  
619 67 newly available genomes.

620

621 **Fig 2: Pairwise Average Nucleotide Identity (ANI) scores between coding regions.** Scores were  
622 calculated from alignments that have 70% or more identity and at least 70% coverage of the shorter  
623 gene.

624

625 **Fig 3: PCA based on GP-SND content as variables.** The fraction of the variance is given in parentheses.  
626 *P. cichorii* JBC1 and two strains of *P. cerasi* are outside 95% confidence ellipse of the phytopathogenic  
627 group.

628

629 **Fig 4: Representative list of discriminating Genome Properties obtained with the GP-SND approach.**  
630 Left panel: enrichment analysis, right panel: Random Forest feature selection. Red lines indicate the  
631 phytobeneficial strains (vertical) and enriched traits (horizontal). Blue lines indicate the  
632 phytopathogenic strains (vertical) and enriched traits (horizontal). Newly sequenced strains are in red.  
633 Enriched GPs that were also highlighted in the RF feature importance analysis are indicated in red.

634

635 **Fig 5: Analysis of the validation set.** (a) PCA of the complete set of SND-GP data: variance is indicated  
636 in brackets. Previously analyzed *Pseudomonas* strains and previous obtained 95% confidence ellipses  
637 are in gray. The validation set is composed of 3 classes: phytobeneficial strains (red squares),



- 638 bioremediation strains (green squares) and unclassified strains (purple squares). The arrow points at  
639 *P. syringae* isolate inb918. (b) Average Nucleotide Identity (ANI) score among *P. syringae* strains.  
640 *Pseudomonas syringae* isolate inb918 is at the top left.

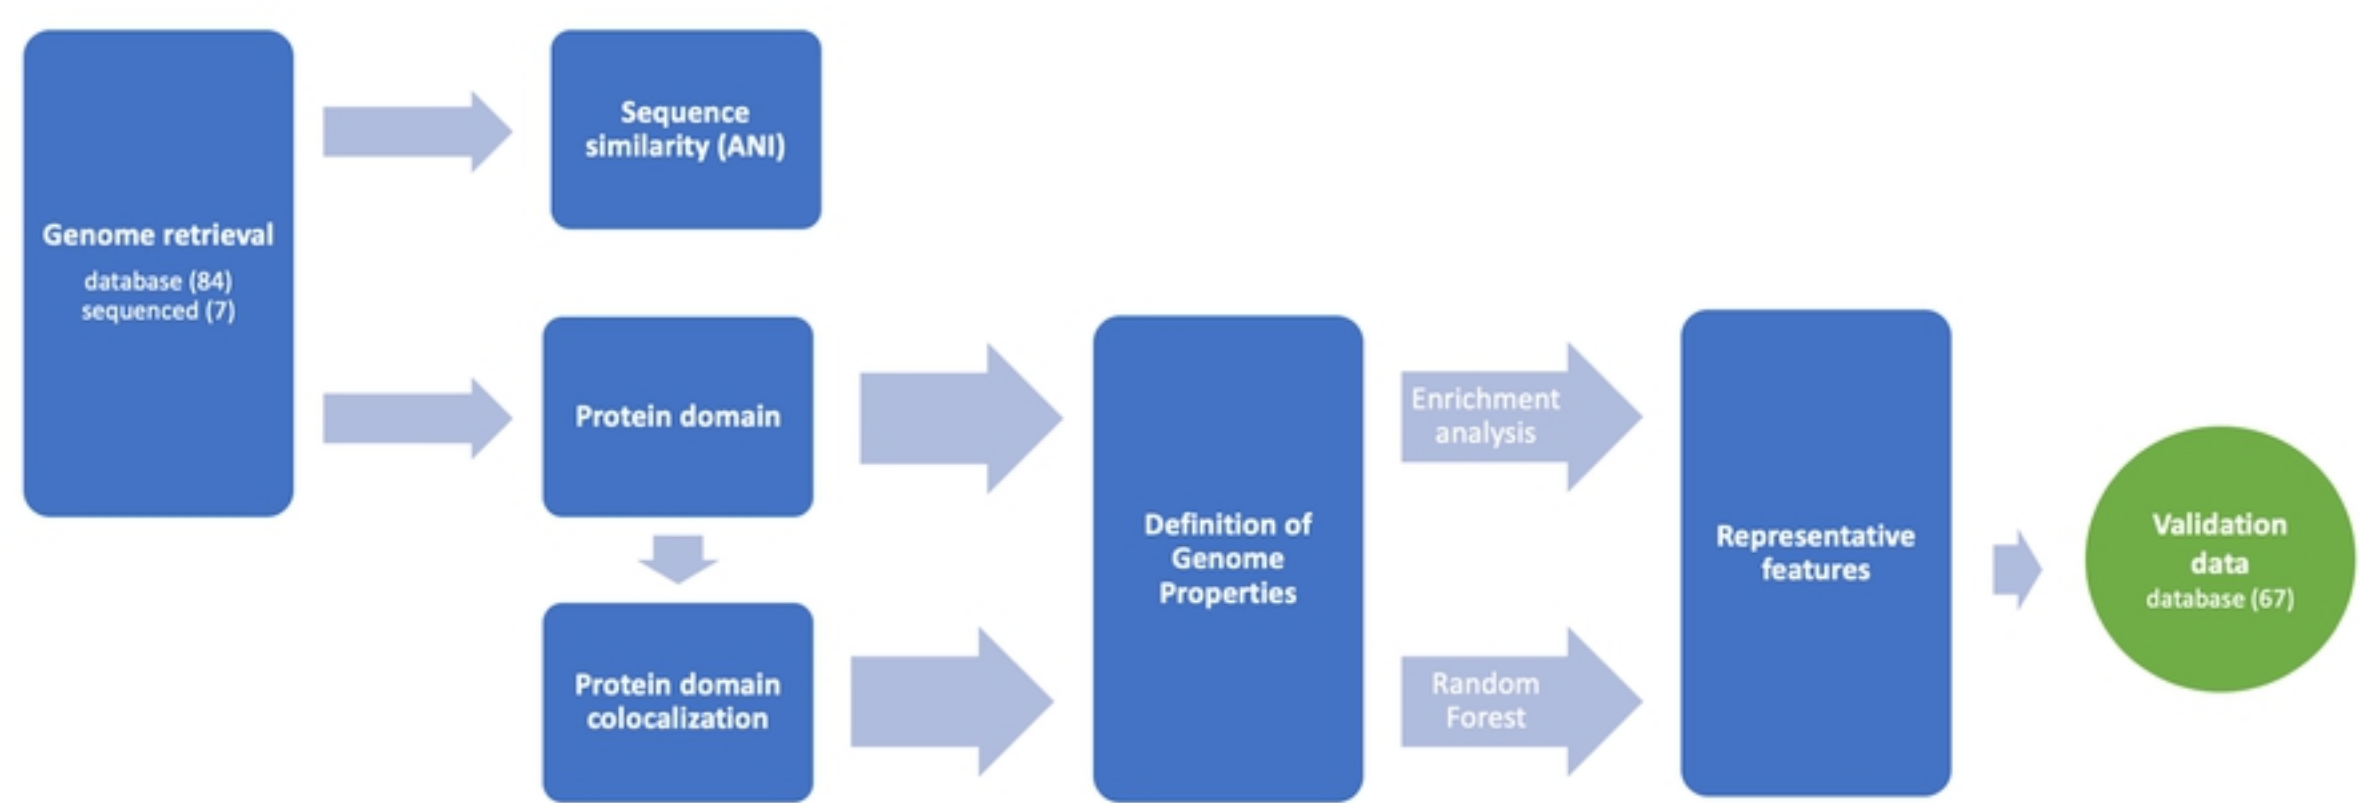

Figure 1

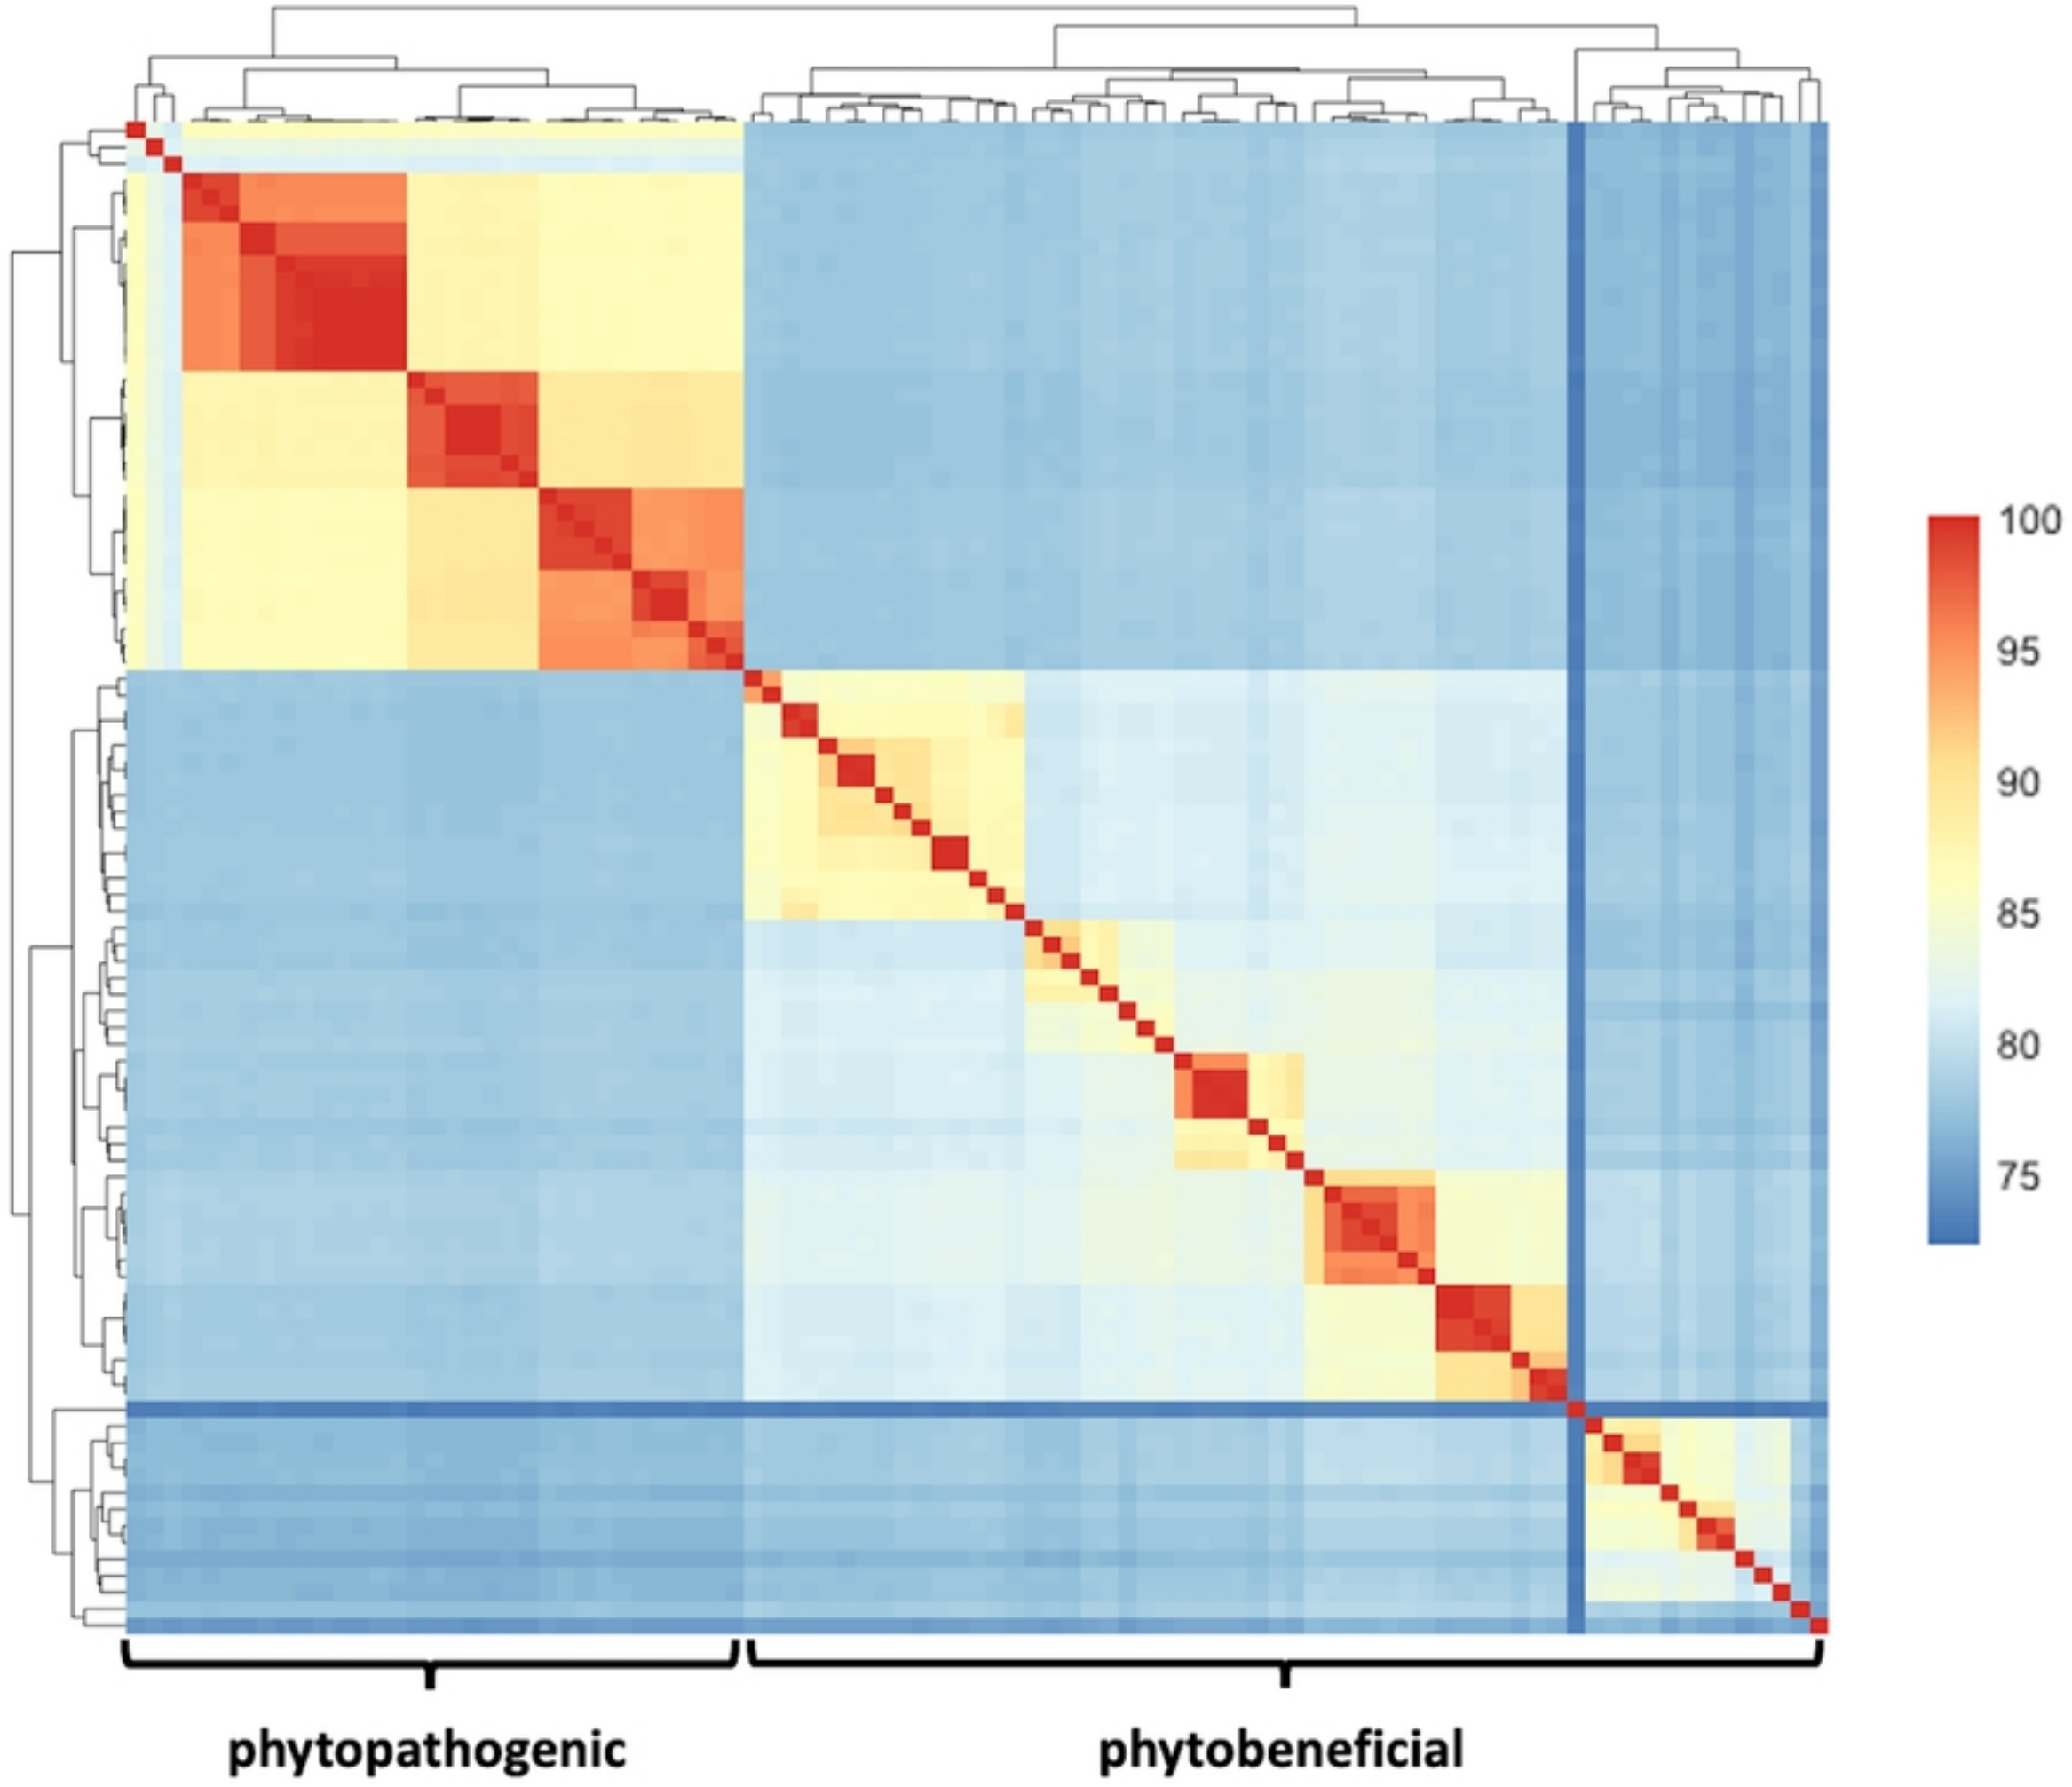

Figure2

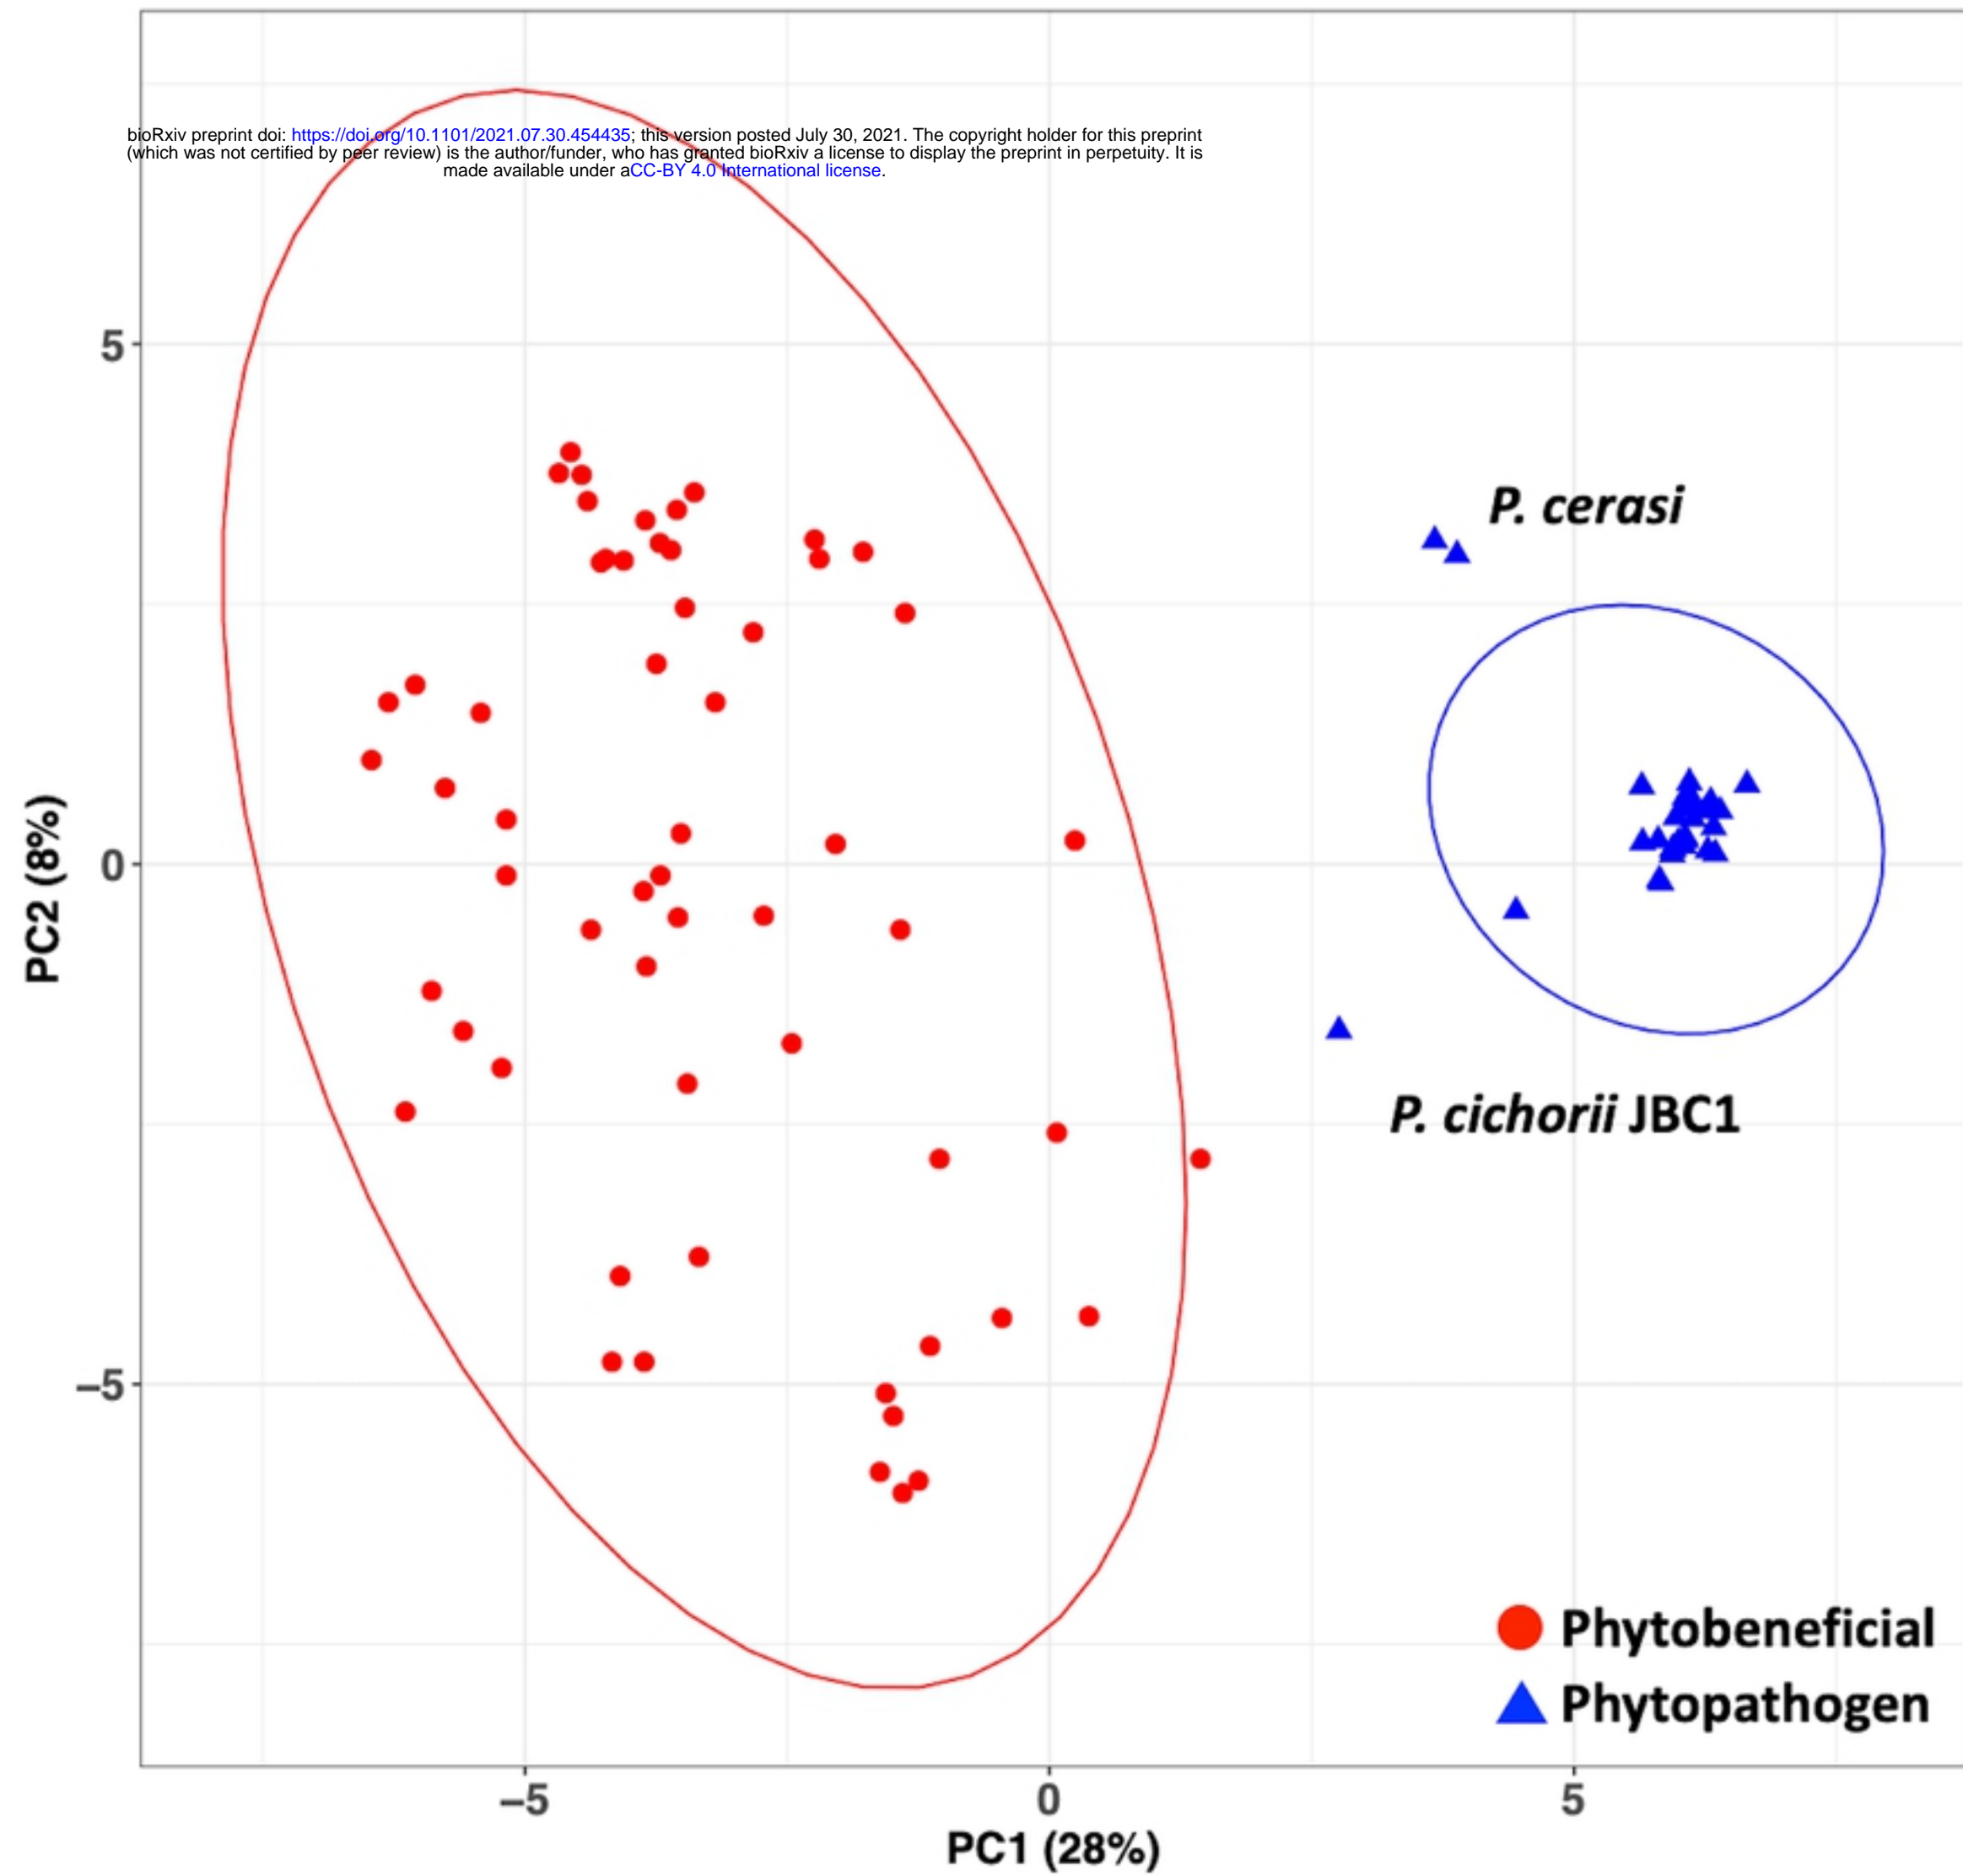

Figure3

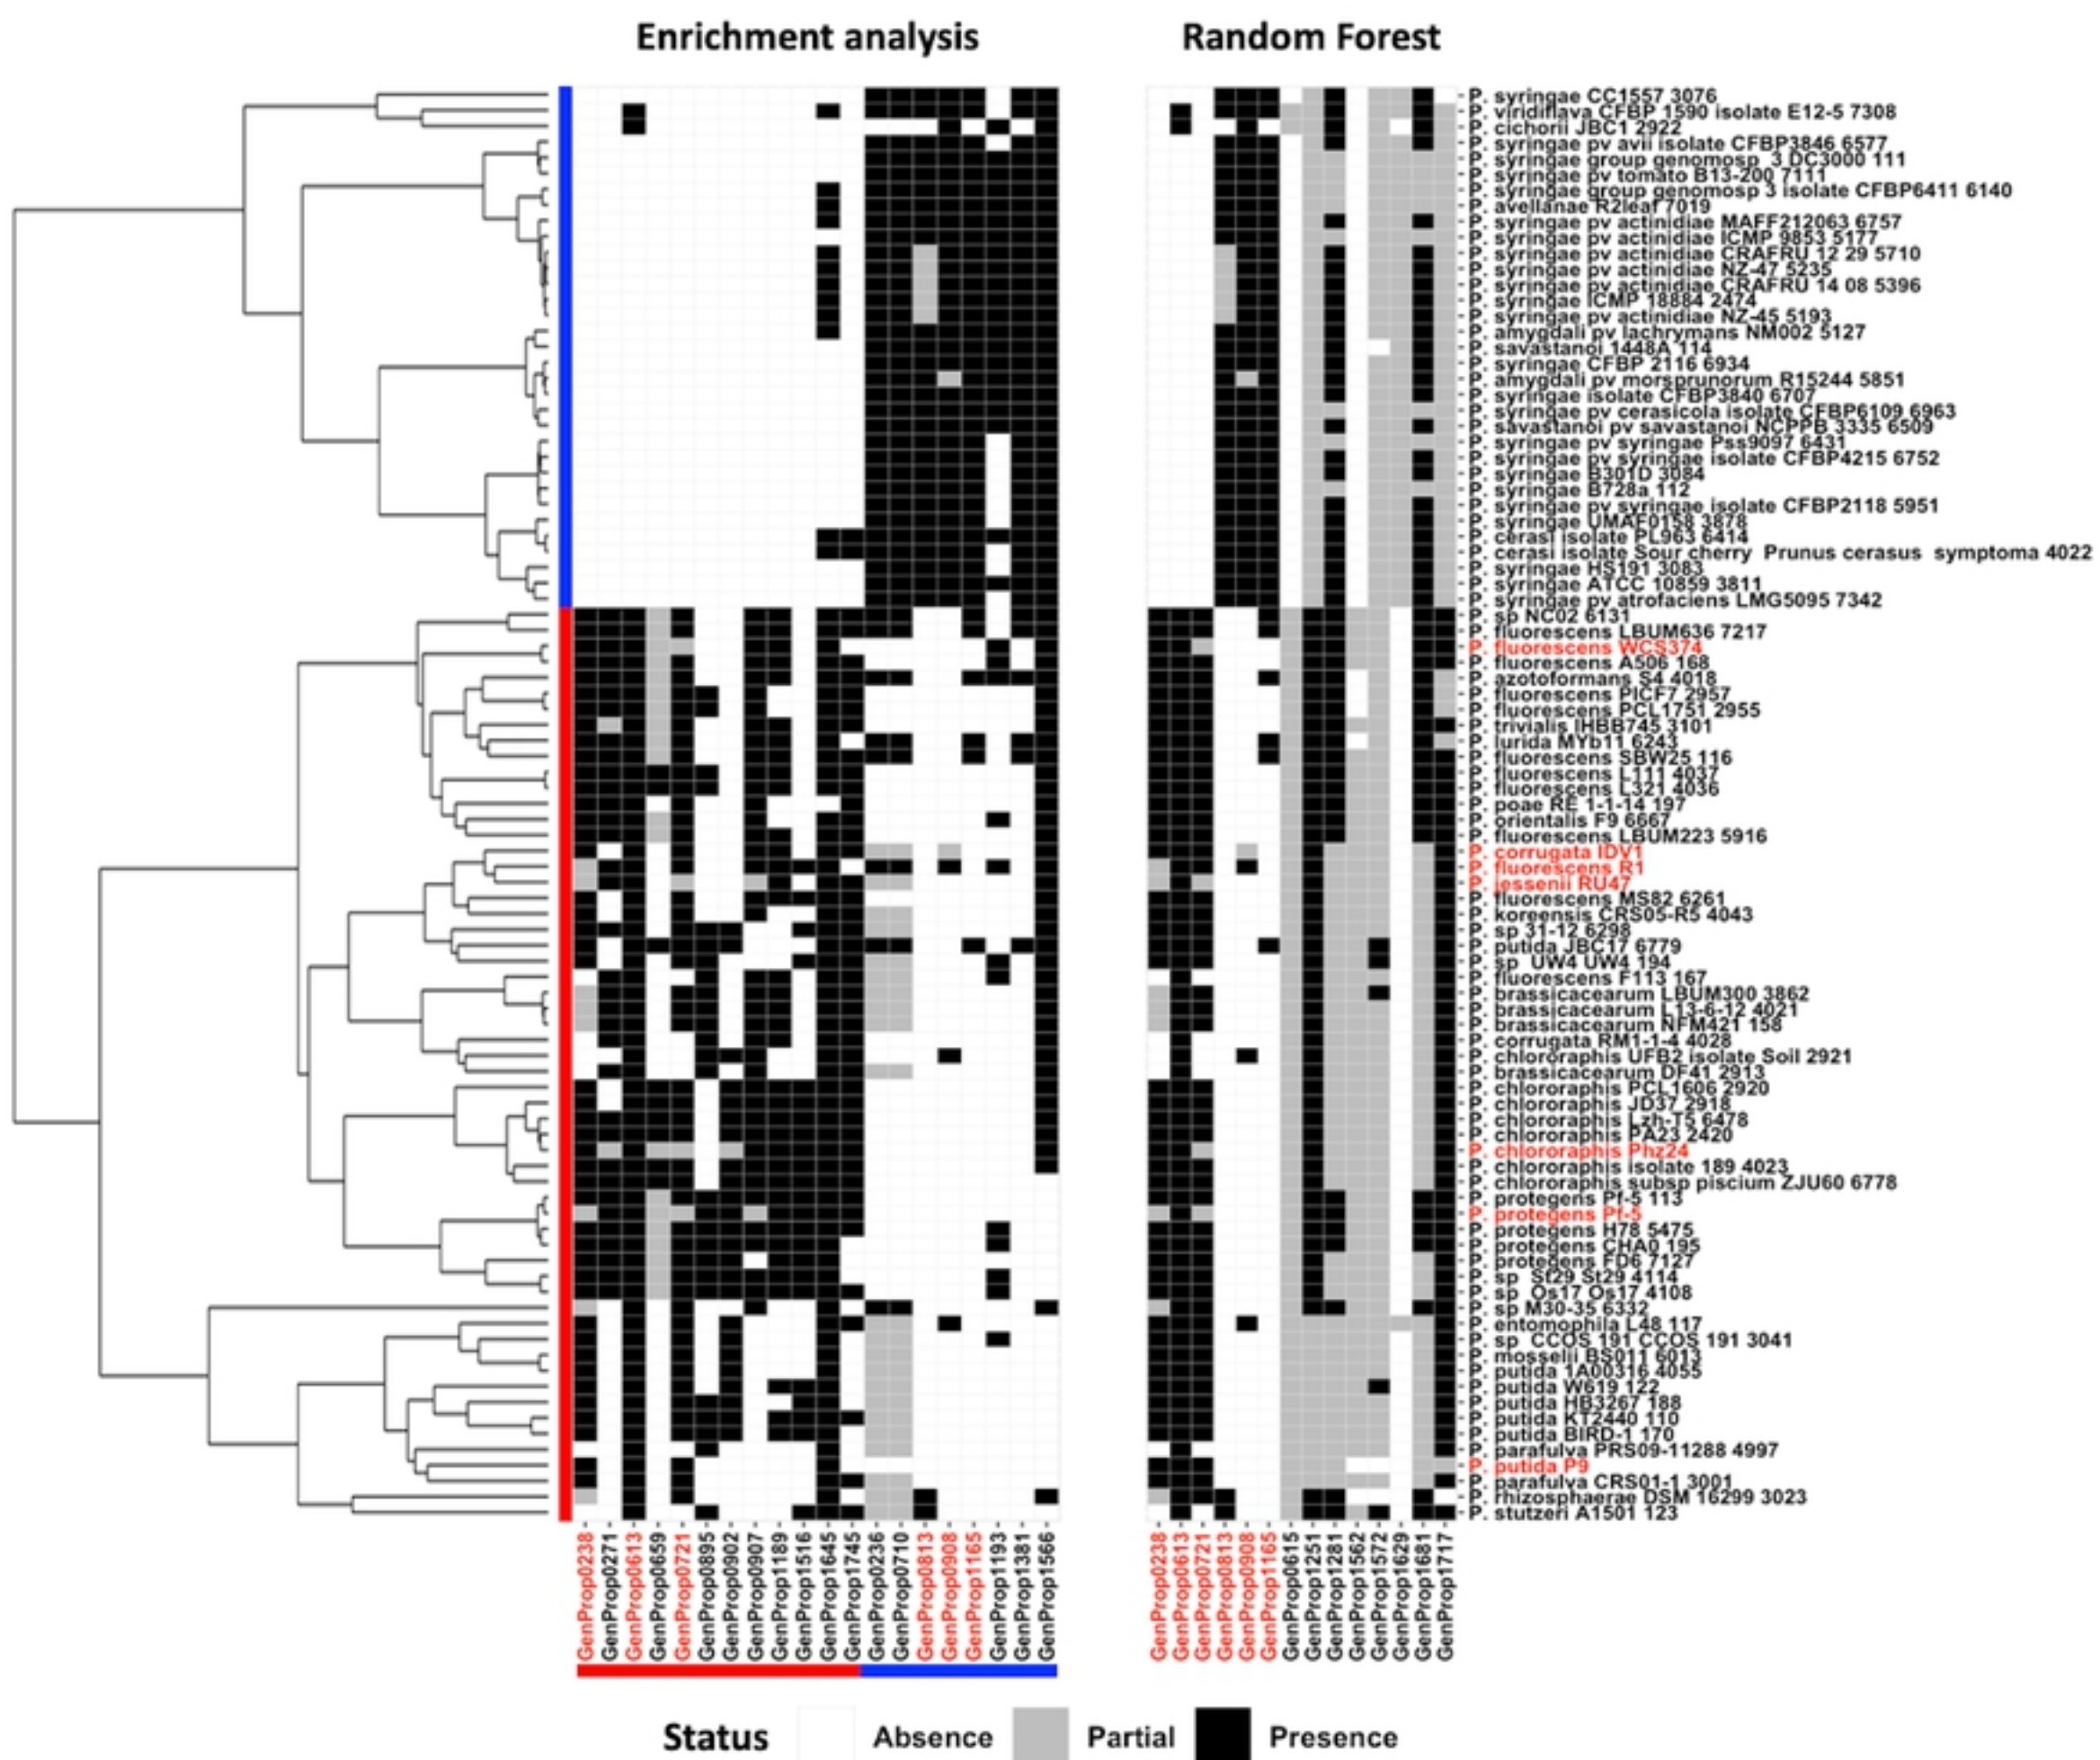

Figure4

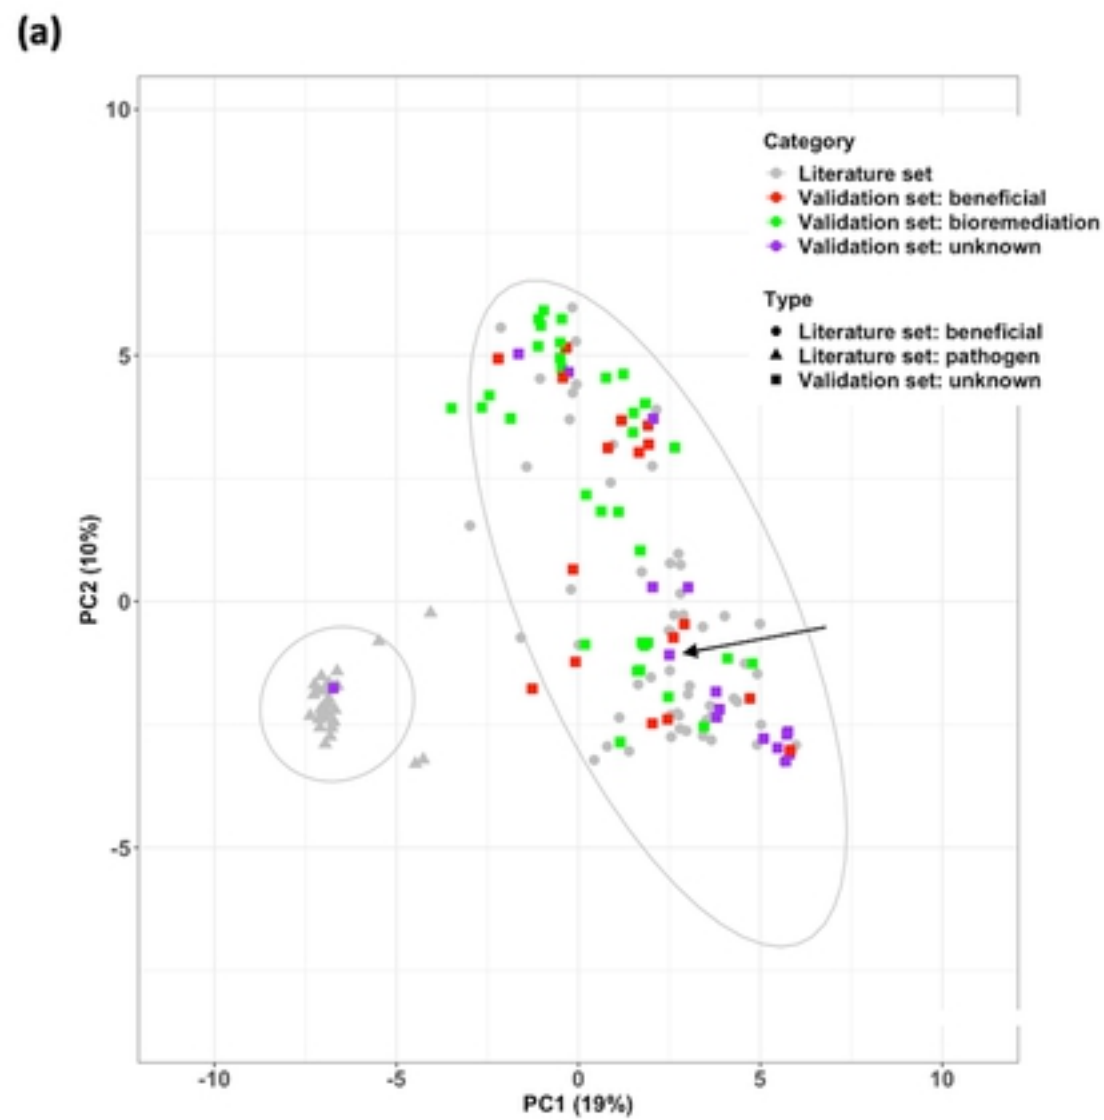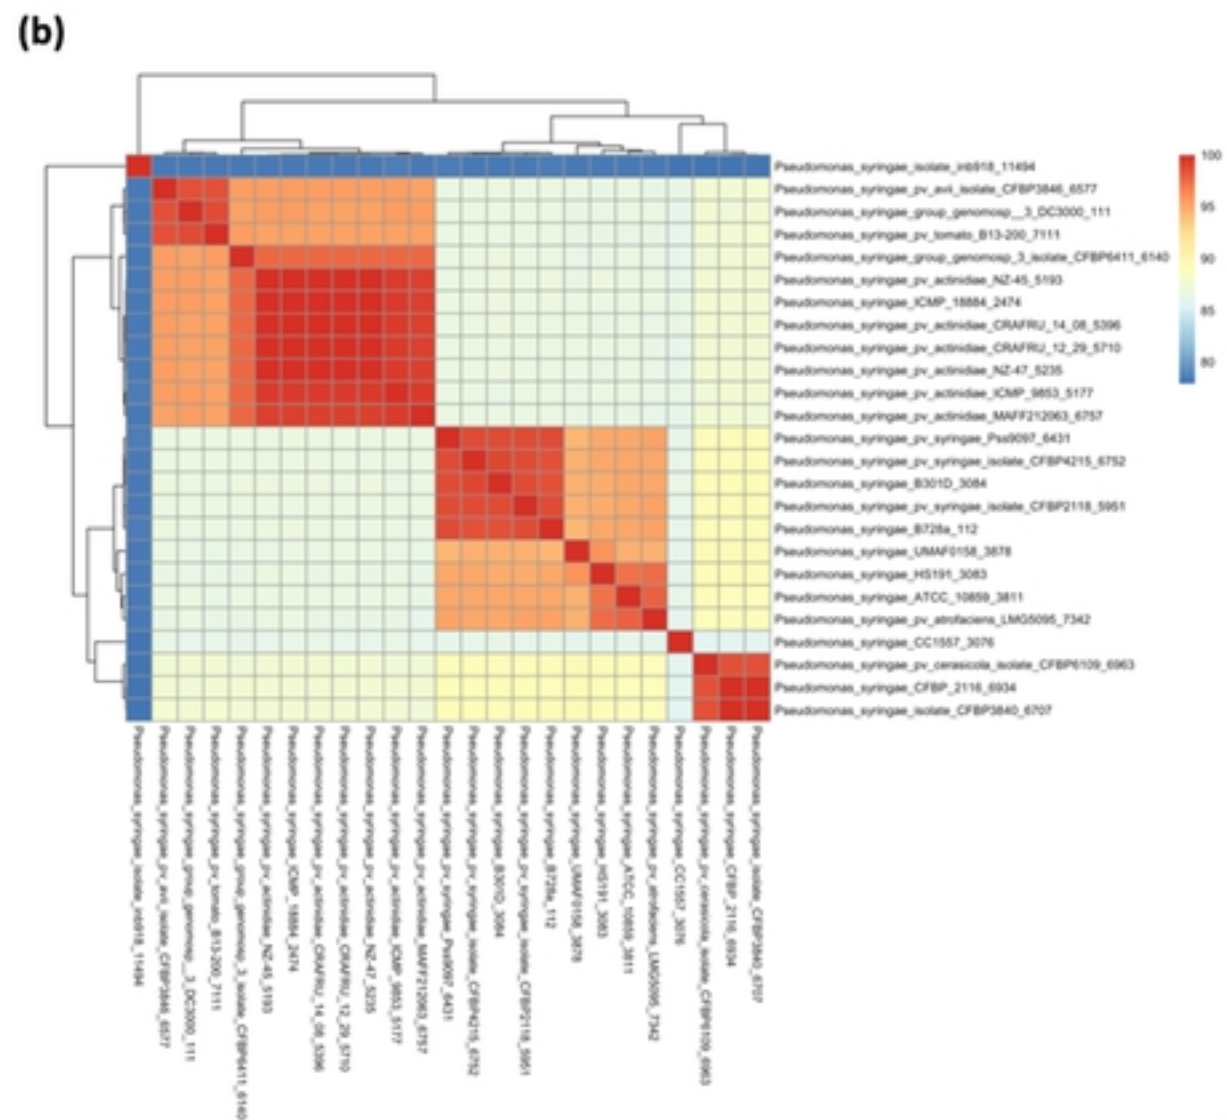

Figure5
